# Supplementary material
Source: PubMed Central journal article supplement (PMC3022001)

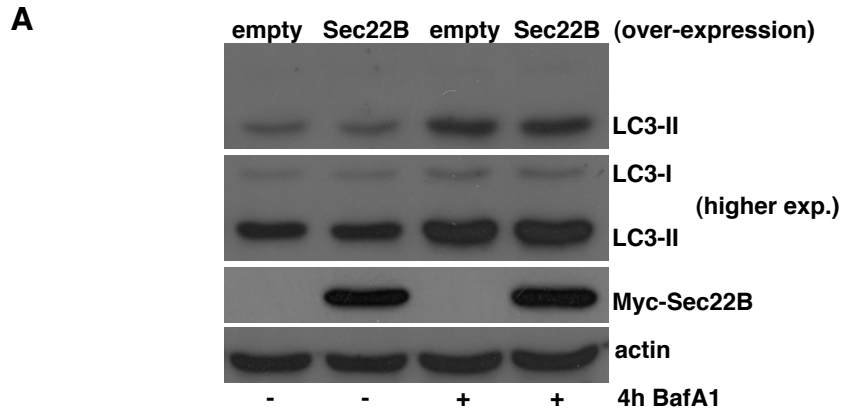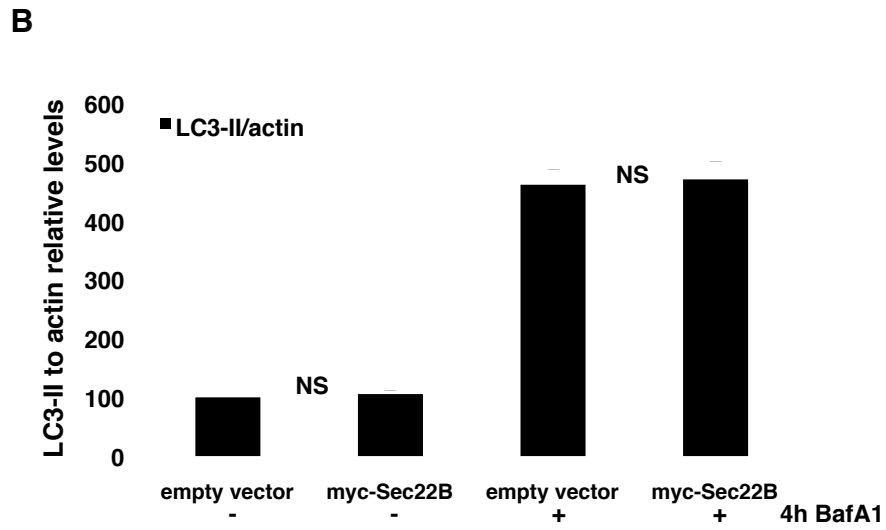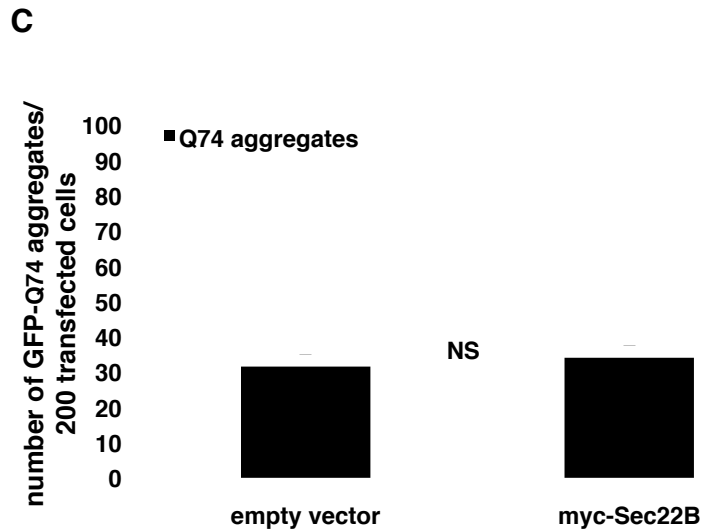

Supplement: supp_124_3_469__1.pdf [file supp_124_3_469__1.pdf]

**FIGURE S2**

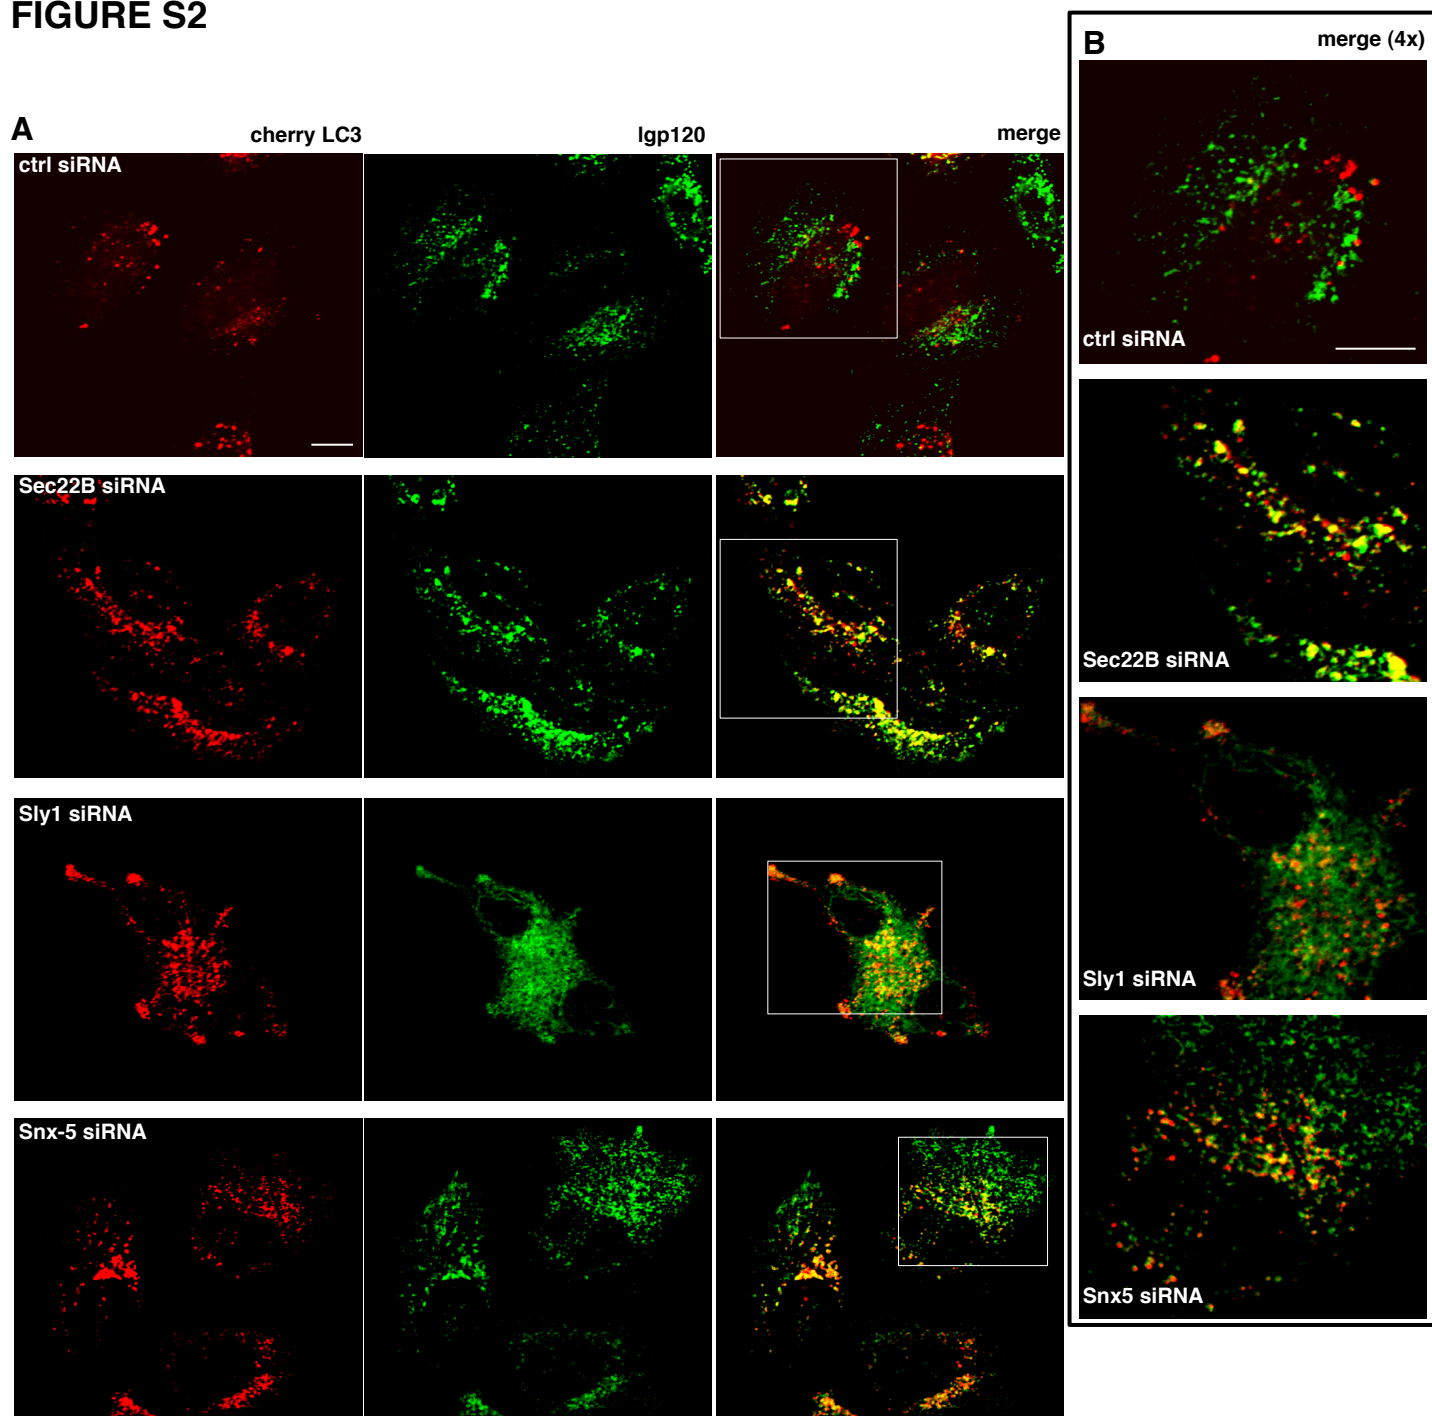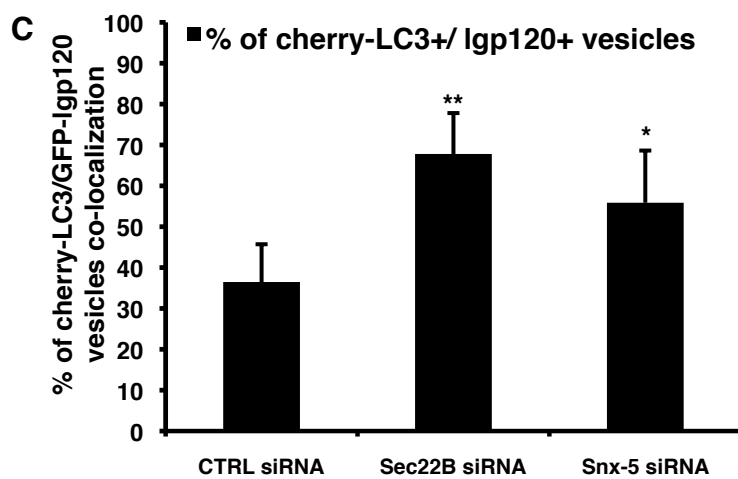

Supplement: supp_124_3_469__2.pdf [file supp_124_3_469__2.pdf]

**A**

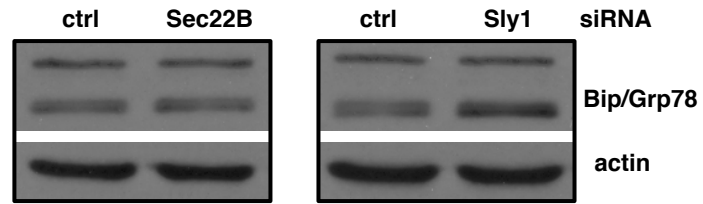

**B**

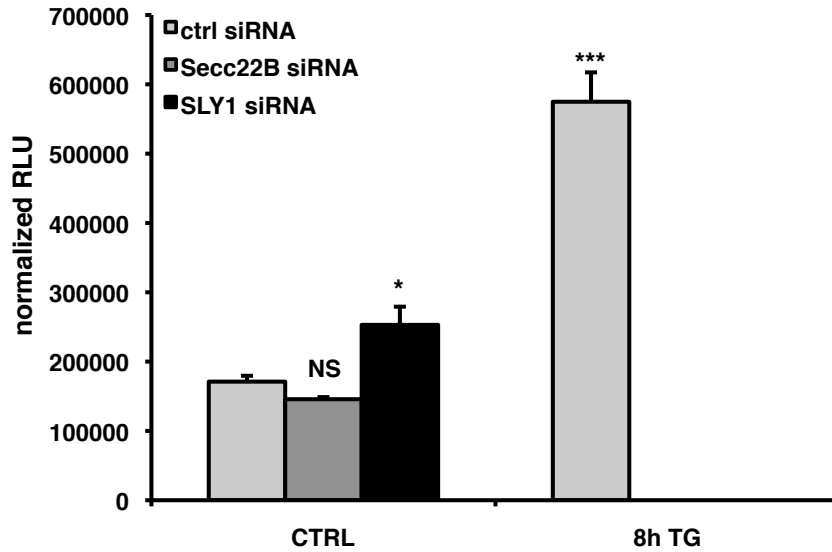

Supplement: supp_124_3_469__3.pdf [file supp_124_3_469__3.pdf]

**A**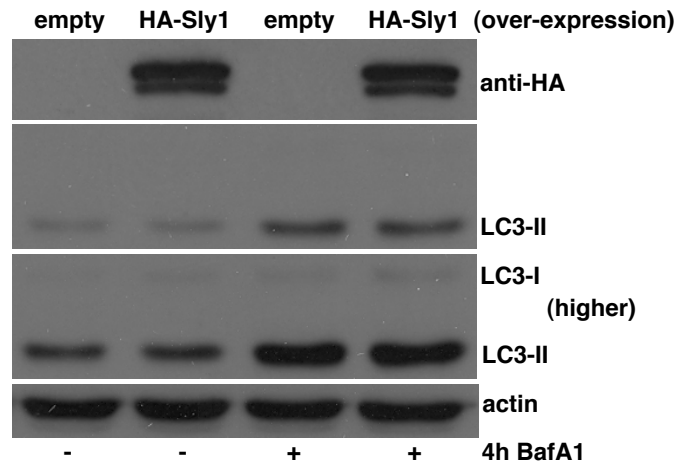**B**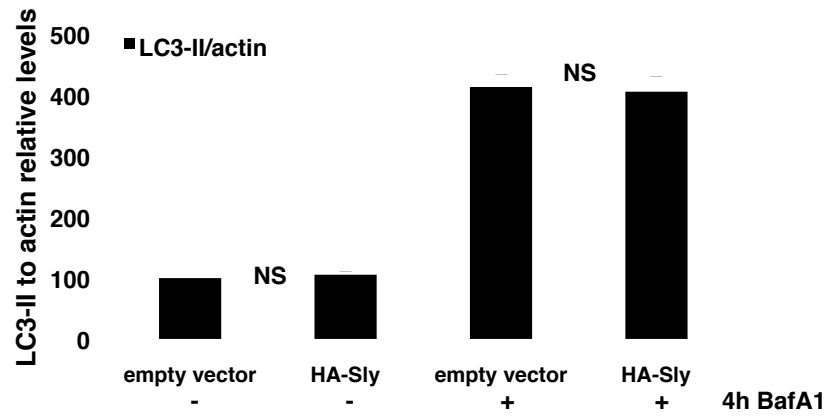**C**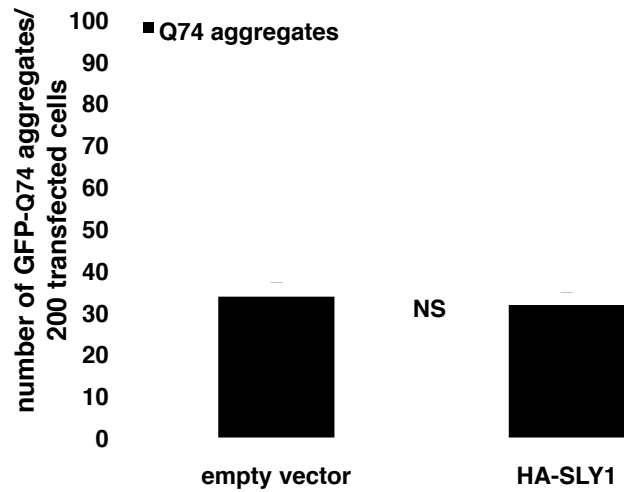

Supplement: supp_124_3_469__4.pdf [file supp_124_3_469__4.pdf]

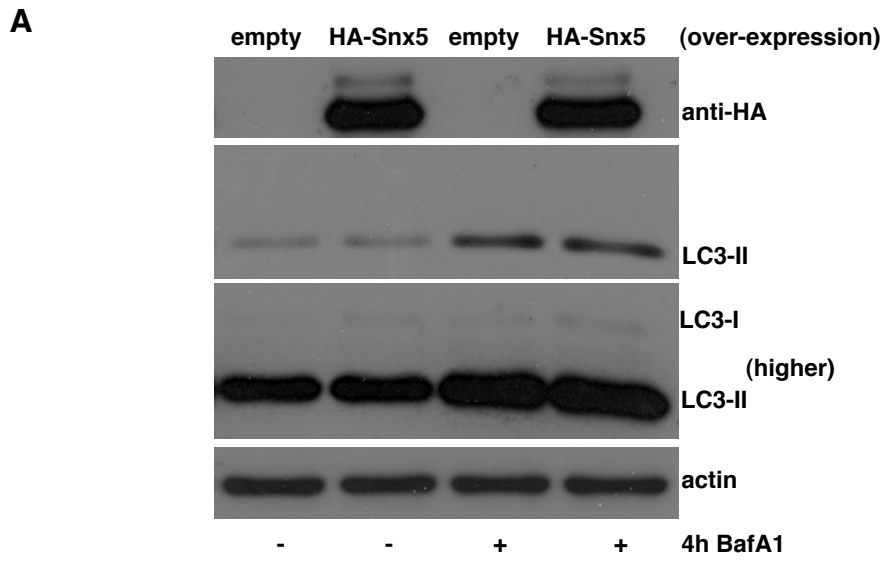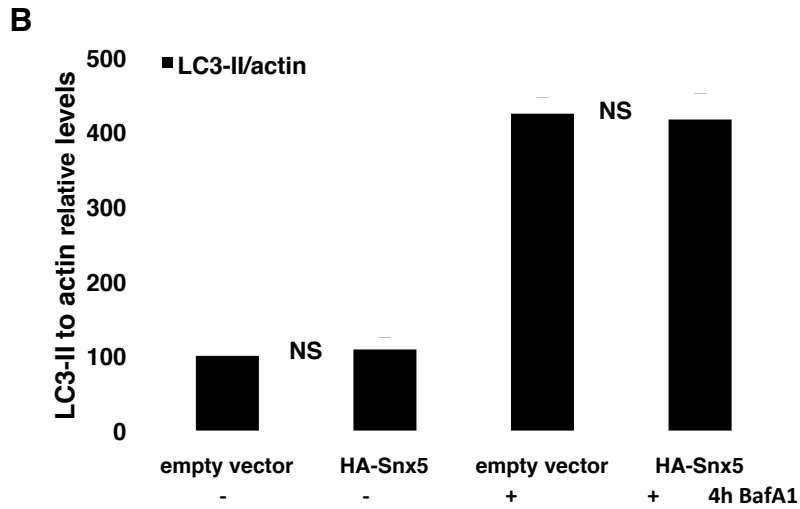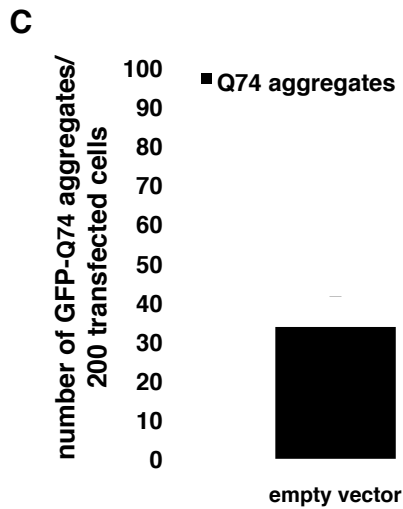

Supplement: supp_124_3_469__5.pdf [file supp_124_3_469__5.pdf]

**A**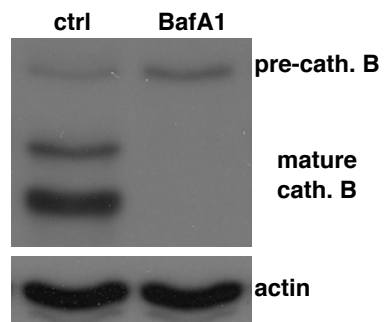**B**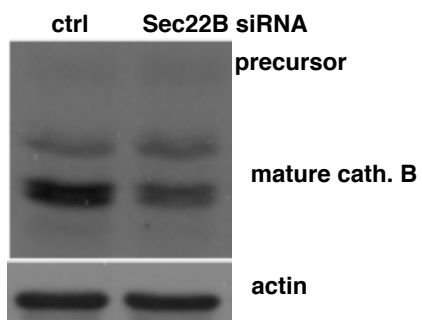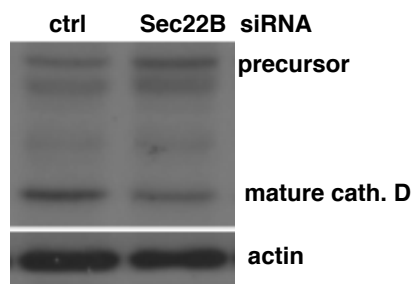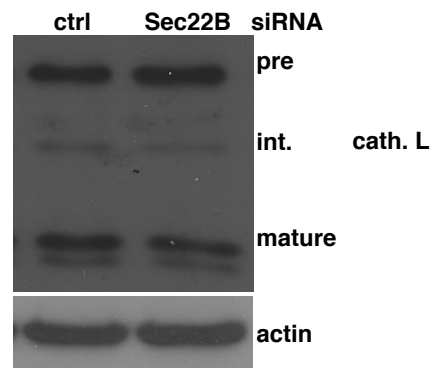**C**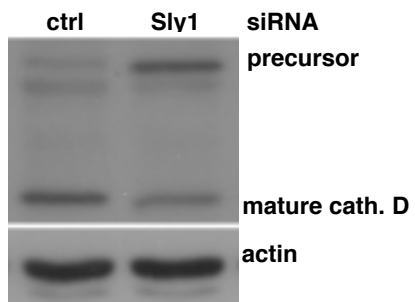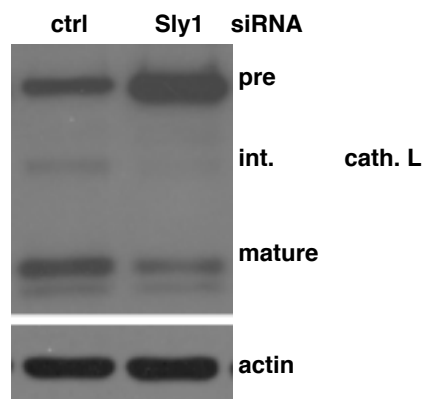

Supplement: supp_124_3_469__6.pdf [file supp_124_3_469__6.pdf]

**A**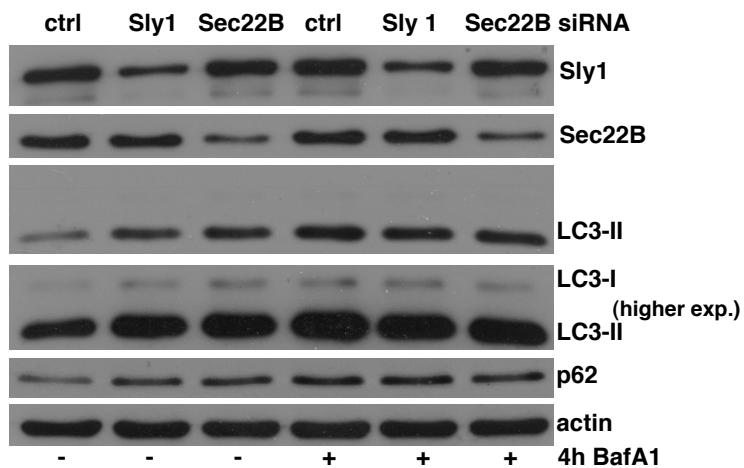**B**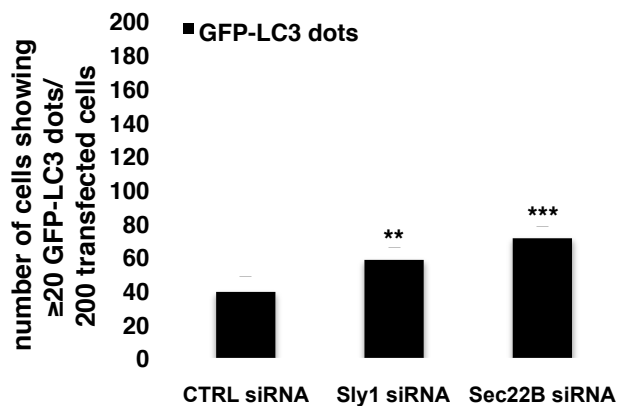**C**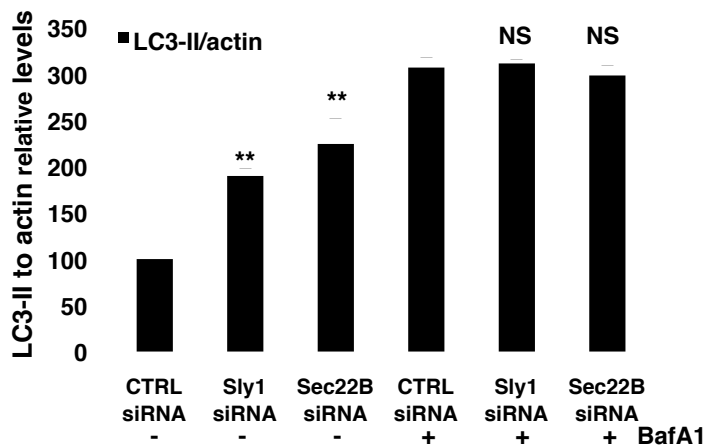**D**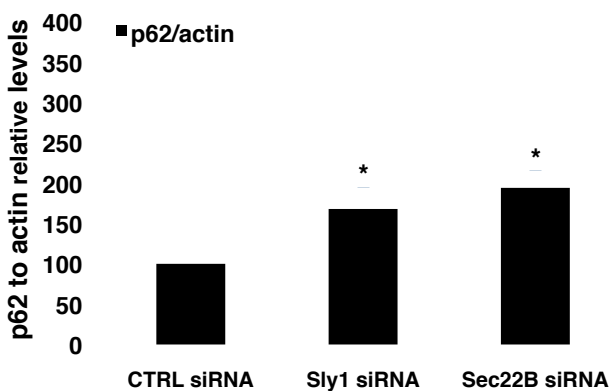**E**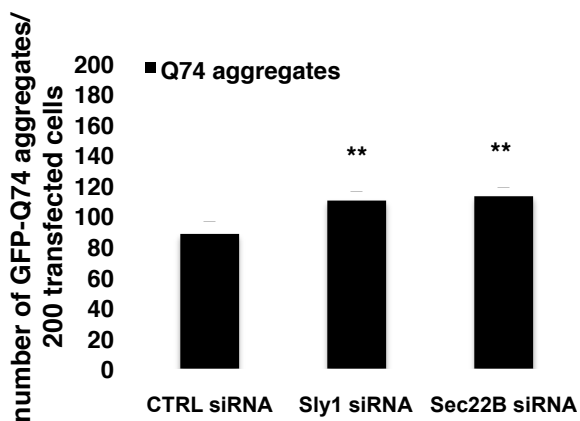**F**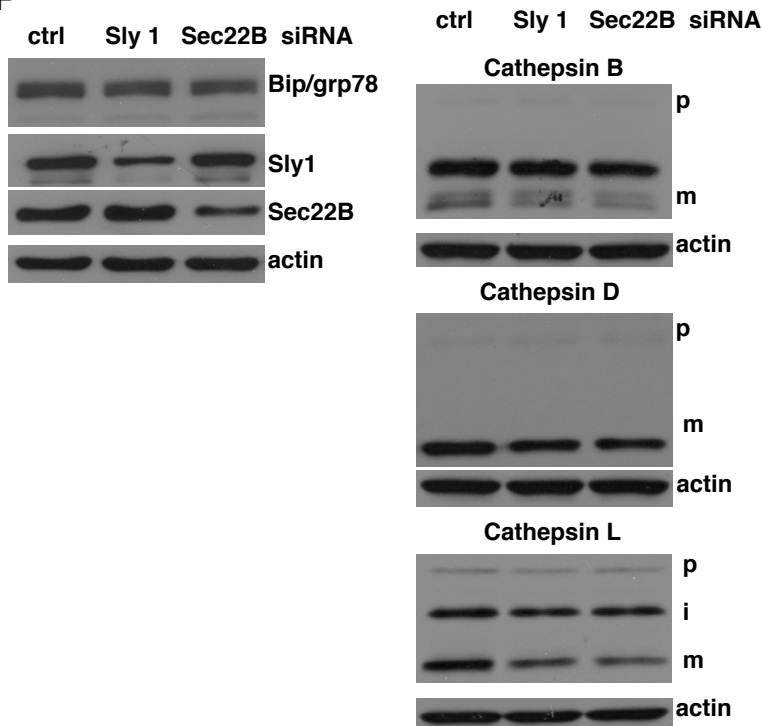

Supplement: supp_124_3_469__7.pdf [file supp_124_3_469__7.pdf]

**A**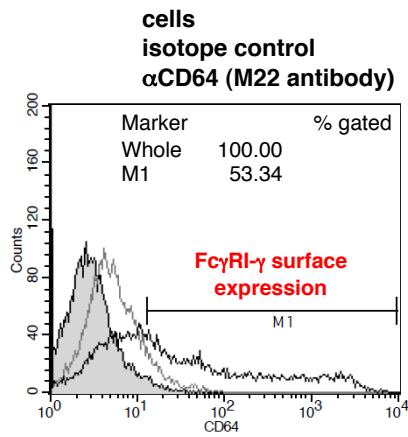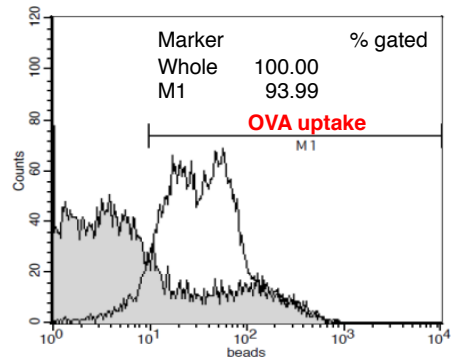**B**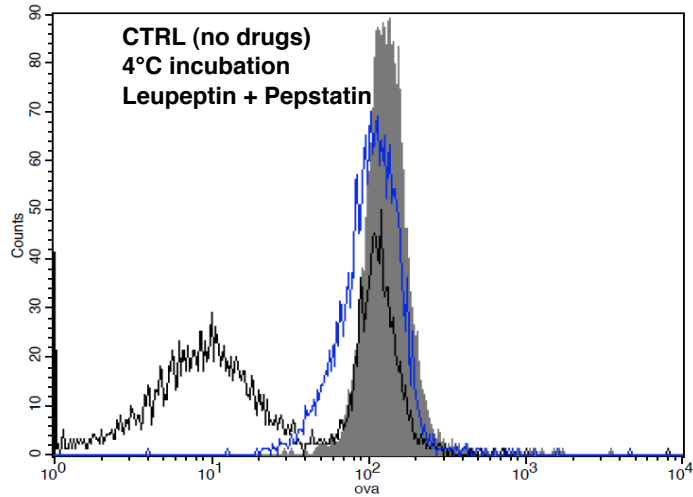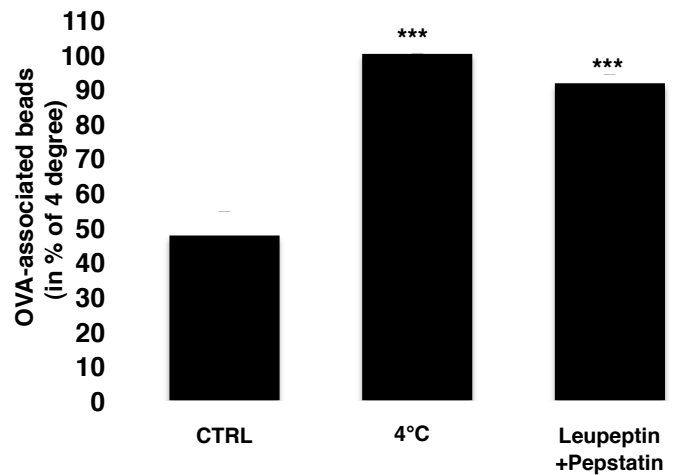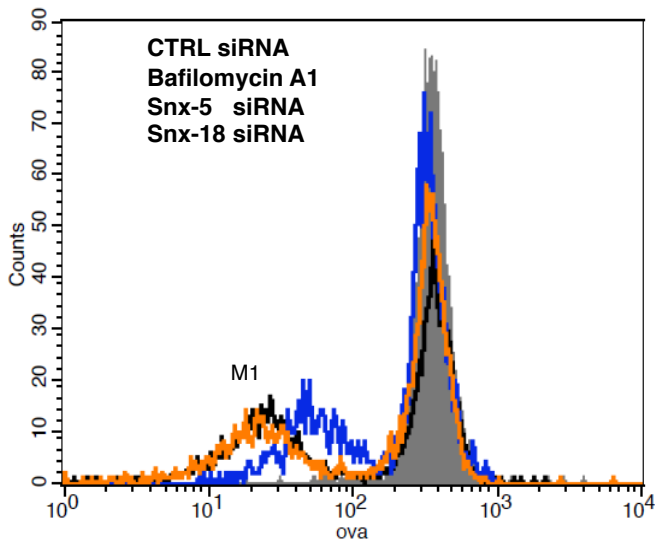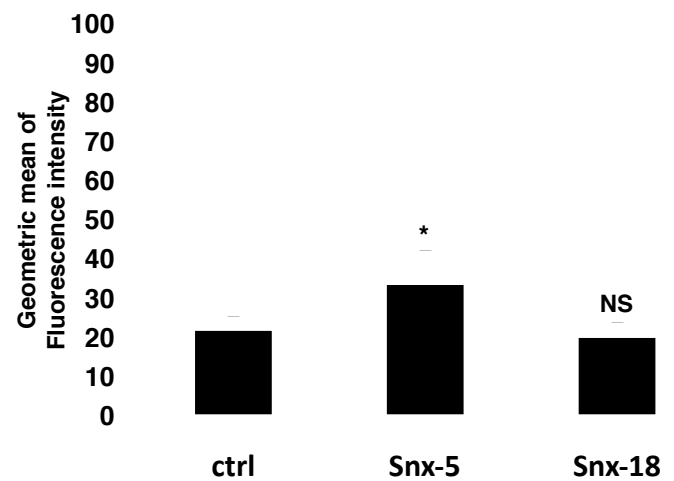

Supplement: supp_124_3_469__8.pdf [file supp_124_3_469__8.pdf]

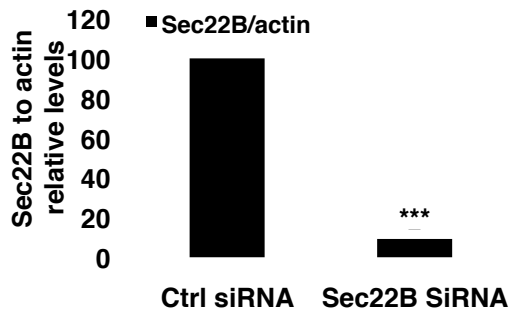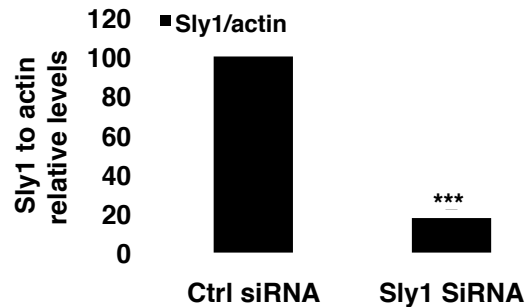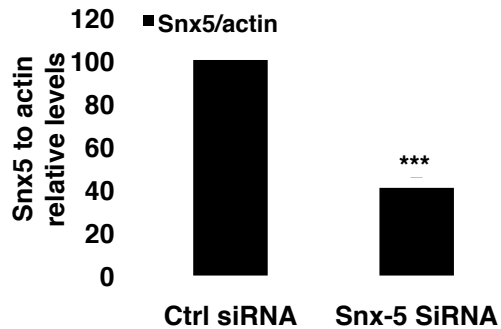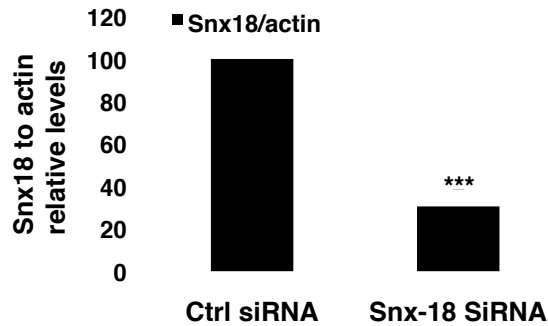

Supplement: supp_124_3_469__9.pdf [file supp_124_3_469__9.pdf]
